# Supplementary material for: Aldosterone Biosynthesis Is Potently Stimulated by Perfluoroalkyl Acids: A Link between Common Environmental Pollutants and Arterial Hypertension
Source: MDPI journal article supplement (doi:10.3390/ijms24119376), 2023-05-27
Supplement: s1 [file s1]

**a**

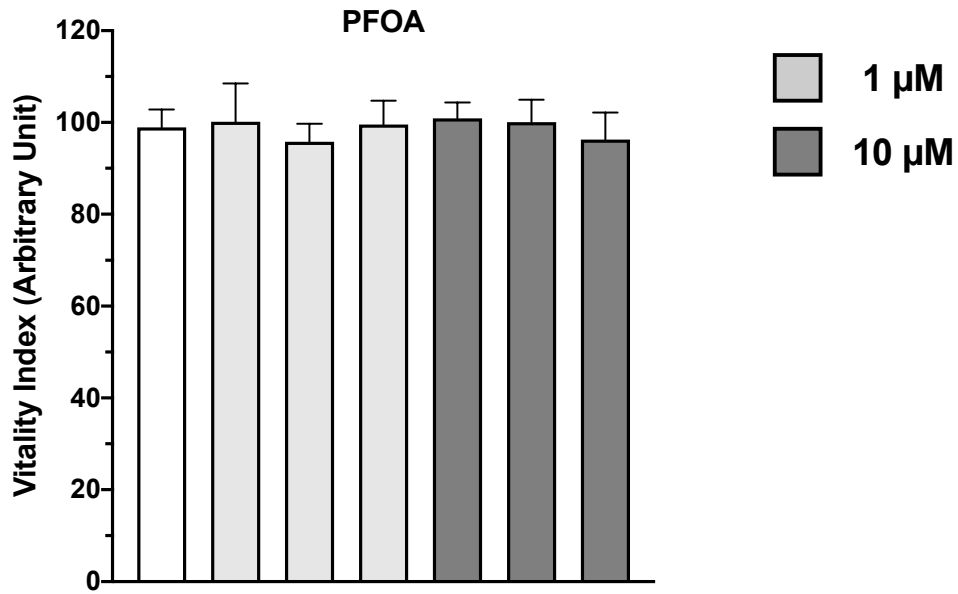

**b**

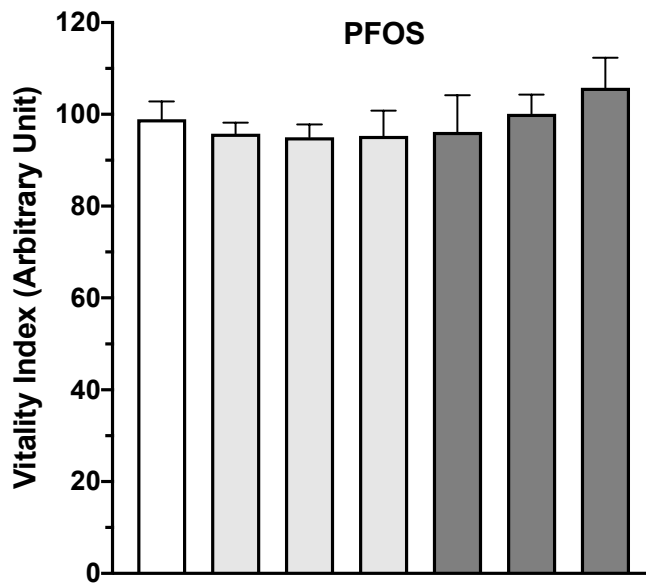

**c**

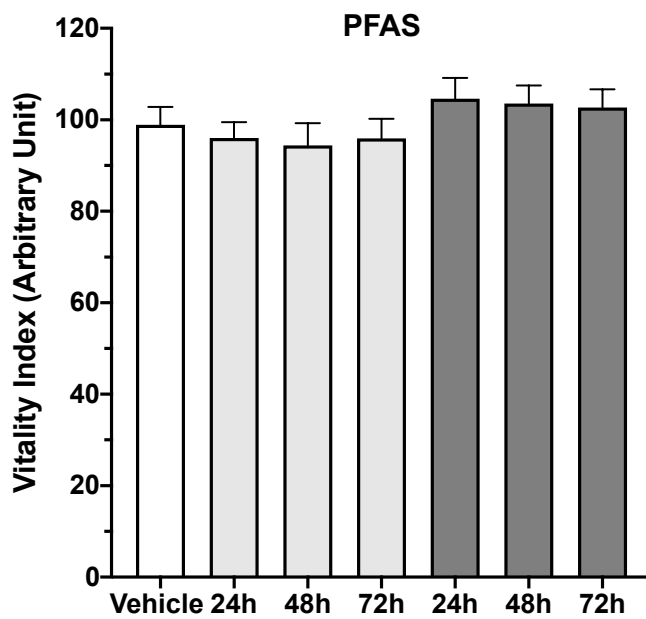

**Supplemental Figure S1. Adrenocortical cells viability is not affected by perfluoroalkyl substances.**

HAC15 cell viability was evaluated by MTT assay at 3 different time points (24, 48 or 72 hours) after treatment with two different concentration, 1  $\mu$ M (in light grey) or 10  $\mu$ M (in dark grey), of PFOA (a), PFOS (b) and PFAS (PFOA + PFOS, c). Cell viability was >95% in all the conditions analysed. Data are reported as a percentage of the treated cells on the untreated controls. One-way ANOVA with Dunnett post hoc test was performed and no significant statistical difference was observed.
